# Supplementary material for: Biological Activities of the Fruit Essential Oil, Fruit, and Root Extracts of Ferula drudeana Korovin, the Putative Anatolian Ecotype of the Silphion Plant
Source: MDPI journal article supplement (doi:10.3390/plants12040830), 2023-02-13
Supplement: s1 [file s1]

# Supplementary Material

## Biological Activities of the Fruit Essential Oil, Fruit, and Root Extracts of *Ferula drudeana* Korovin, the Putative Anatolian Ecotype of the Silphion Plant <sup>†</sup>

Fatma Tosun <sup>1,\*</sup>, Fatih Göger <sup>2</sup>, Gökalep İşcan <sup>3</sup>, Mine Kürkçüoğlu <sup>3</sup>, Fadıl Kaan Kuran <sup>4</sup> and Mahmut Miski <sup>4,\*</sup>

<sup>1</sup> Department of Pharmacognosy, School of Pharmacy, İstanbul Medipol University, İstanbul 34083, Turkey

<sup>2</sup> Department of Pharmaceutical Botany, Faculty of Pharmacy, Afyonkarahisar Health Sciences University, Afyonkarahisar 03030, Turkey; fatih.goger@afsu.edu.tr

<sup>3</sup> Department of Pharmacognosy, Faculty of Pharmacy, Anadolu University, Eskişehir 26470, Turkey; giscan@anadolu.edu.tr (G.İ.); mkurkcuo@anadolu.edu.tr (M.K.)

<sup>4</sup> Department of Pharmacognosy, Faculty of Pharmacy, İstanbul University, İstanbul 34116, Turkey; kaankuran@gmail.com

\* Correspondence: ftosun@medipol.edu.tr (F.T.); mahmut.miski@gmail.com (M.M.); Tel.: +90-5334798035 (F.T.); +90-5455504455 (M.M.)

<sup>†</sup> Dedicate this publication to the victims of the February 6th South-East Anatolia Earthquake.

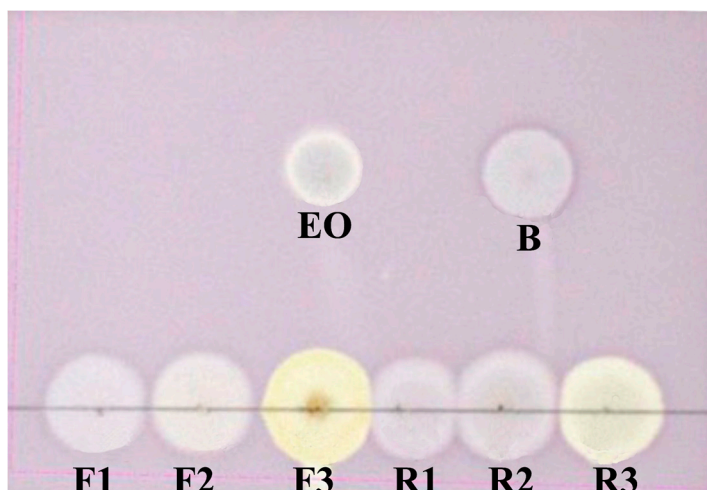

**Figure. S1.** The DPPH<sup>•</sup> reagent evaluation of the essential oil and extracts of *Ferula drudeana*. **EO**: Essential oil, **B**: Blank, **F**: Fruit extracts, **R**: Root extracts (1: Petroleum ether, 2: Methylene chloride, 3: Methanol)

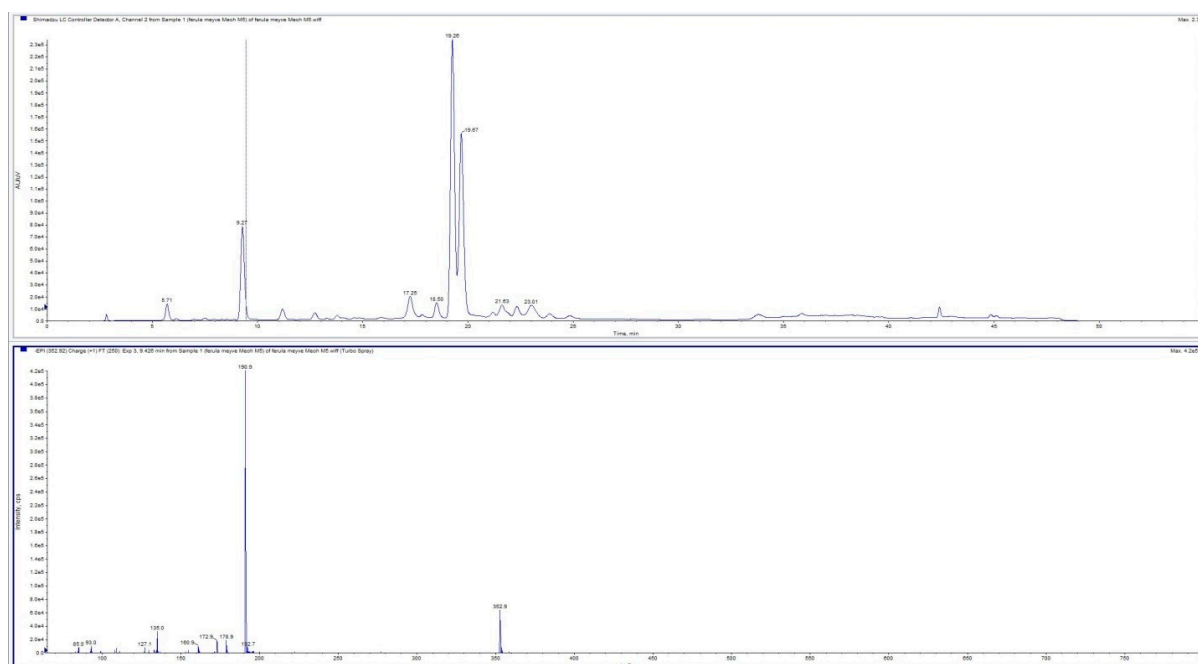

**Figure. S2.** LC-MS/MS spectrum of 5-caffeoylquinic acid (**13**, chlorogenic acid)

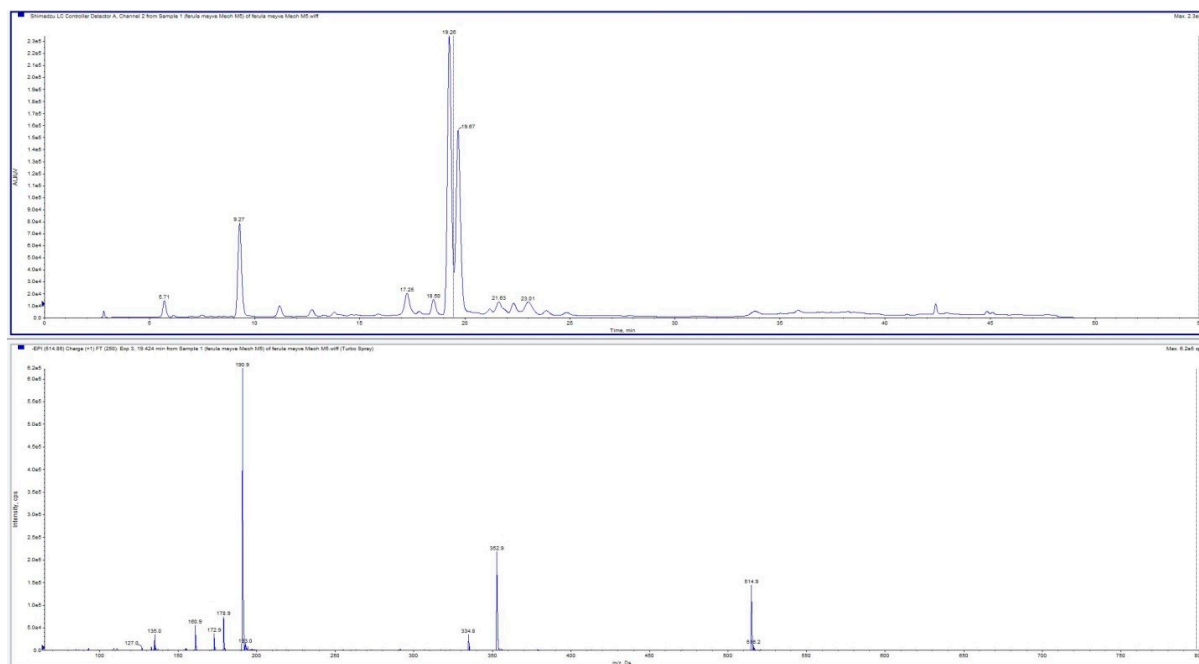

**Figure. S3.** LC-MS/MS spectrum of 1,5-dicafeoylquinic acid (16, cynarine)

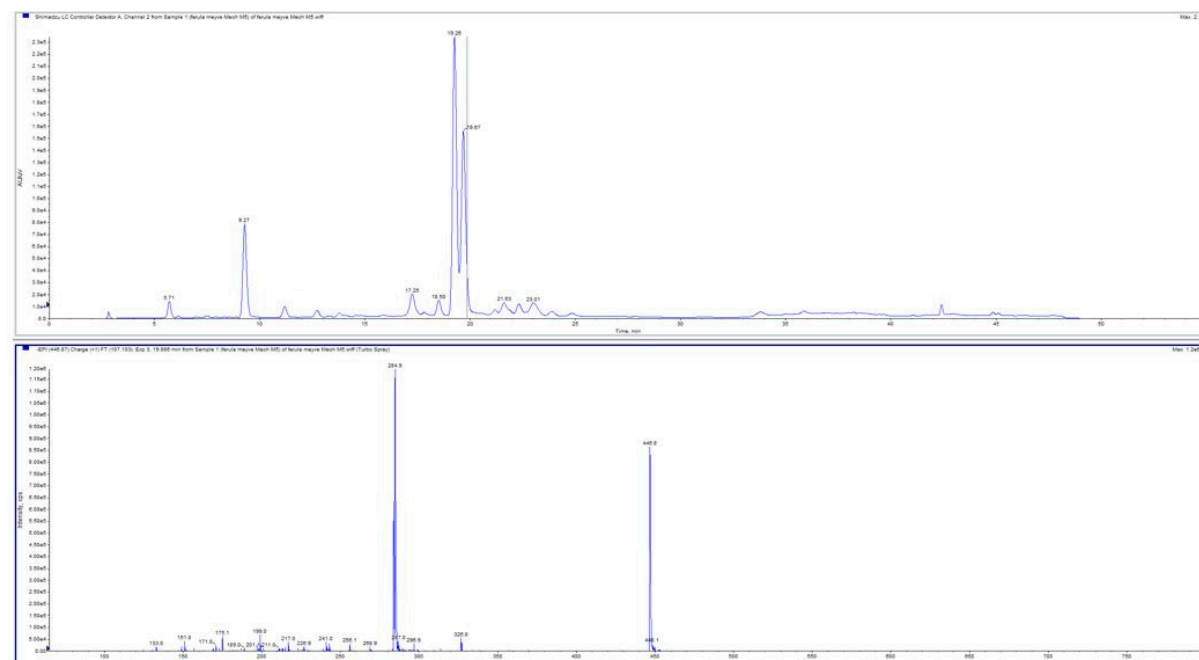

**Figure. S4.** LC-MS/MS spectrum of Luteolin 7-glucoside (18, cynaroside)
